# Supplementary material for: Inhibition of Hedgehog Delays Liver Regeneration through Disrupting the Cell Cycle
Source: MDPI journal article supplement (doi:10.3390/cimb44020032), 2022-01-18
Supplement: s1 [file s1]

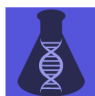

Article

# Inhibition of Hedgehog Delays Liver Regeneration through Disrupting the Cell Cycle

Table S1. Primer sequence of genes.

| Name             |         | Sequence                |
|------------------|---------|-------------------------|
| <i>Gli1</i>      | forward | GGAATTTCGTGTGCCATTGGG   |
|                  | reverse | AGGCGTGAATAGGACTTCCG    |
| <i>Gli2</i>      | forward | GATGCCAACCAGAACAAGCAG   |
|                  | reverse | AGTCATCCCTGTCCAGGTCTT   |
| <i>Gli3</i>      | forward | GAAGAAACGCAATCACTATGCAG |
|                  | reverse | GTCCACCGGTAAGGGAGAGA    |
| <i>Ptc</i>       | forward | GCATTCTGGCCCTAGCAATA    |
|                  | reverse | GGTAGCTCTCATAGCCTGGA    |
| <i>Ihh</i>       | forward | GAATCACTGGCCATCTCTGT    |
|                  | reverse | TATTCGGTCACGGTCTGAGG    |
| <i>Cyclin D1</i> | forward | TGACTGCCGAGAAGTTGTGC    |
|                  | reverse | CTCATCCGCCTCTGGCATT     |
| <i>Cyclin B1</i> | forward | AAGGTGCCTGTGTGTGAACC    |
|                  | reverse | GTCAGCCCCATCATCTGCG     |
| <i>CDK1</i>      | forward | AGGTACTTACGGTGTGGTGTAT  |
|                  | reverse | CTCGCTTCAAGTCTGATCTTCT  |
| <i>CDK2</i>      | forward | ATGGAGAACTTCCAAAAGGTGG  |
|                  | reverse | CAGTCTCAGTGTGAGCCG      |
| <i>APC2</i>      | forward | GCCTGGAATACTGTGAGCACC   |
|                  | reverse | ATTGCCTTGAAGGTCGTTCTG   |
| <i>APC11</i>     | forward | GATGGCGTTTAATGGCTGCTG   |
|                  | reverse | TCCACTCCTGGCGACACAT     |
| <i>CDC20</i>     | forward | GTTTCGTGTTGAGAGCGATTT   |
|                  | reverse | CTAGGGGTGGTCTGAACCTT    |
| <i>Bub1b</i>     | forward | AACAGAACTACCTCAAGGGG    |
|                  | reverse | GGCAAGGGAAACGCCAATTC    |
